# Supplementary material for: Atg5 Supports Rickettsia australis Infection in Macrophages In Vitro and In Vivo
Source: PubMed Central journal article supplement (PMC6300621; doi:10.1128/iai.00651-18), 2018-12-19
Supplement: 786f5461def39be8fc9282987bd4f53a_IAI.00651-18-s0001.pdf [file 786f5461def39be8fc9282987bd4f53a_IAI.00651-18-s0001.pdf]

## Supplementary FIG 1

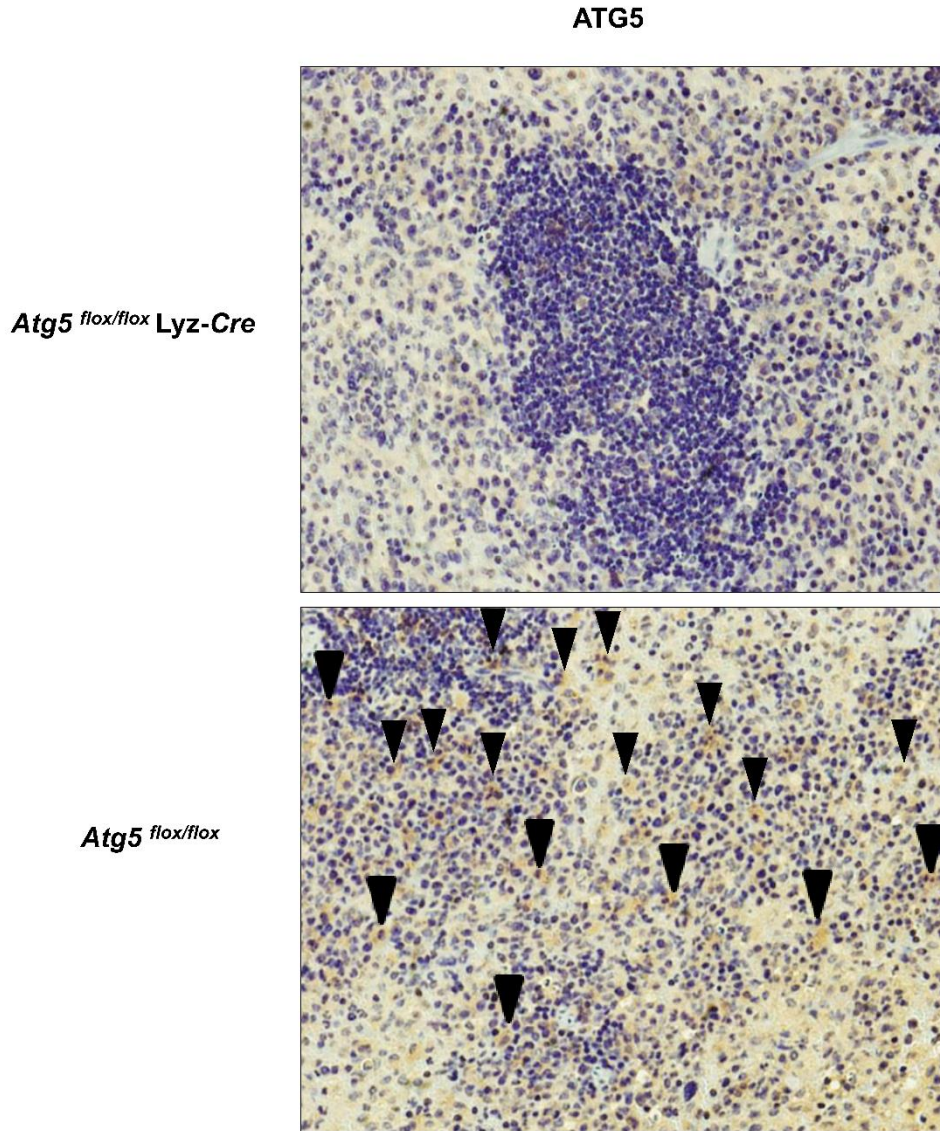

**Supplementary FIG 1.** Immunohistochemical staining of ATG5 in *Atg5<sup>flox/flox</sup>* and *Atg5<sup>flox/flox</sup> Lyz-Cre* mice. Spleen of infected *Atg5<sup>flox/flox</sup> Lyz-Cre* and *Atg5<sup>flox/flox</sup>* mice was processed for immunohistochemical analysis of ATG5 using specific antibodies directed against ATG5. ATG5 was stained as brown (shown as black arrow heads).

## Supplementary FIG 2

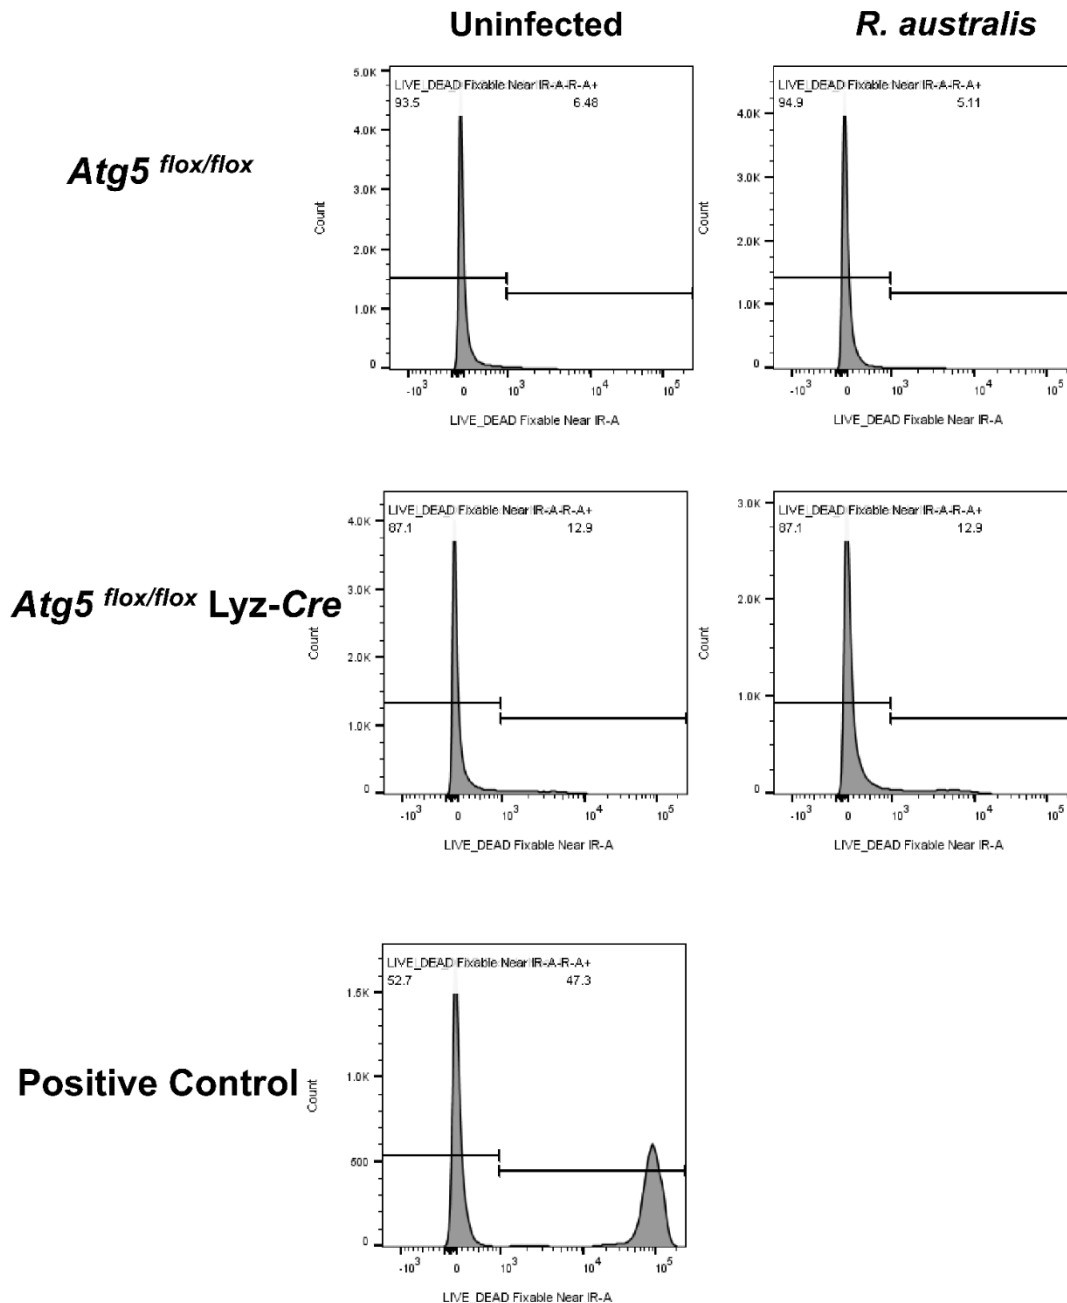

**Supplementary FIG 2.** Viability of *R. australis*-infected BMMs of *Atg5* flox/flox and *Atg5* flox/flox Lyz-Cre mice. BMMs of *Atg5* flox/flox and *Atg5* flox/flox Lyz-Cre mice were infected with *R. australis* at an MOI of 2. At 48 h p.i., Cells were collected and stained for viability using LIVE/DEAD® Fixable Near-IR Dead Cell Stain Kit (Life Technologies, Grand Island, NY) in accordance with the manufacturer's protocol. Positive control was composed of half alive and half dead BMMs of *Atg5* flox/flox Lyz-Cre mice. Flow cytometry was performed on 30,000 cells with a FACSCalibur laser cytometer (Becton-Dickinson, BD Biosciences, San Jose, CA). Data analysis on the entire ungated cell population was performed using FlowJo software. Data represented two independent experiments.

## Supplementary FIG 3

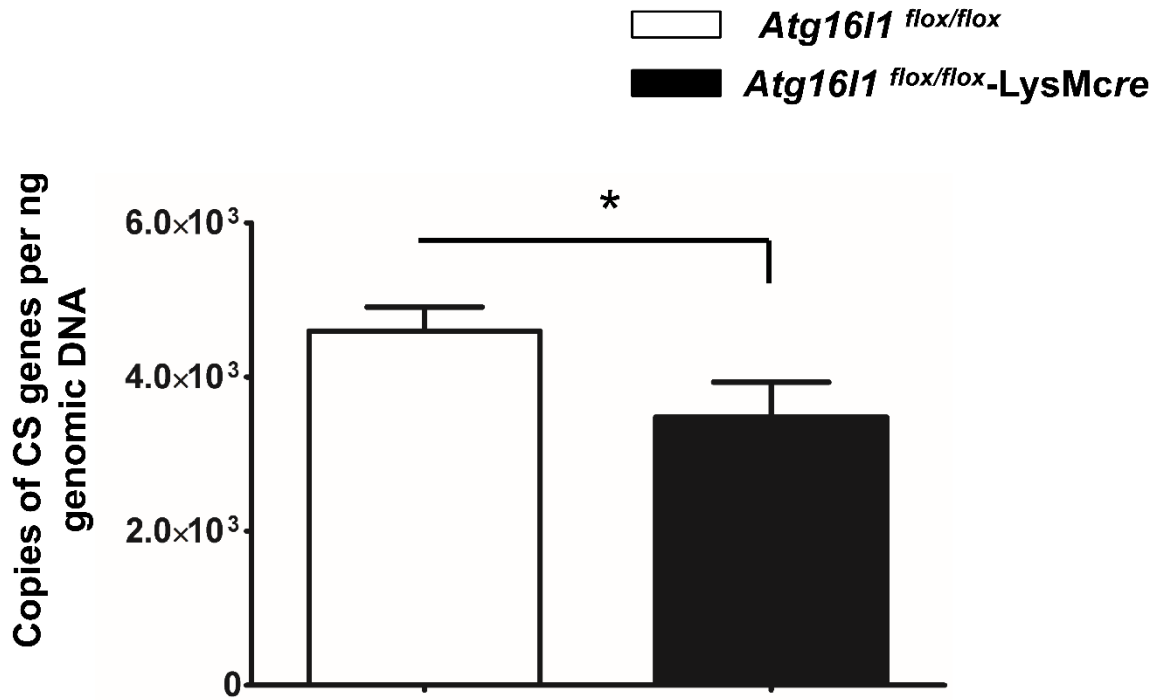

**Supplementary FIG 3.** Significantly increased concentrations of *R. australis* in *Atg16l1*<sup>flox/flox</sup> BMMs compared to *Atg16l1*<sup>flox/flox-LysMCre</sup> BMMs *in vitro*. BMMs of *Atg16l1*<sup>flox/flox-LysMCre</sup> and *Atg16l1*<sup>flox/flox</sup> mice were infected with *R. australis* at an MOI of 2. Rickettsial concentration in these primary mouse macrophages was evaluated by quantitative real-time PCR at 48 h p.i.. Number of citrate synthase (CS) gene copies per ng of genomic DNA represents the quantity of rickettsiae. \*,  $p < 0.05$ .
